# Supplementary material
Source: publisher figshare collection journal article supplement (https://f1000.figshare.com/ndownloader/files/1418601)
Supplement: Supplementary file 1 [file 1418601]

Time (hours)	Non-induced	Induced	Chitosan 2 hrs post-induction	Chitosan 4 hrs post-induction
0	0	0	0	0
	0	0	0	0
2	0	2440	2100	1920
	0	1880	1890	2020
4	0	5620	0	0
	0	5640	0	0
6	18	6780	0	0
	20	6470	0	0
